# Supplementary material for: Multi-screening of β-lactam antibiotics for β-lactamase resistance by means of a paper-based analytical device with a 4-(2-pyridylazo)resorcinol (PAR)–Hg2+complex
Source: Royal Society of Chemistry journal article supplement (doi:10.1039/c9ay00223e), 2019-01-01
Supplement: c9ay00223e1.pdf [file c9ay00223e1.pdf]

## Supplementary Information

### **Multi-screening of $\beta$ -lactam antibiotics for $\beta$ -lactamase resistance by means of a paper-based analytical device with the 4-(2-pyridylazo)resorcinol (PAR)– $\text{Hg}^{2+}$ complex**

Suji Lee, Min Sik Eom and Min Su Han\*

Department of Chemistry, Gwangju Institute of Science and Technology, 123  
Cheomdangwagi-ro, Buk-gu, Gwangju 61005, Republic of Korea

\*E-mail: happyhan@gist.ac.kr; Tel: +82-62-715-2848

## Stability of PAR–Hg<sup>2+</sup> complex in presence of $\beta$ -lactam antibiotics

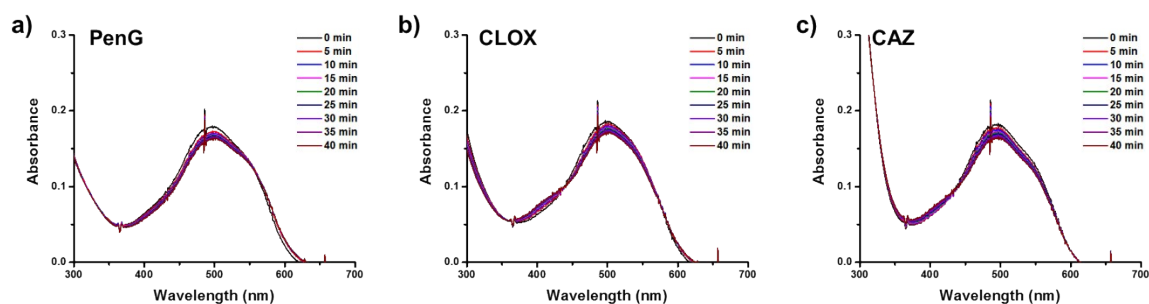

**Figure S1** UV/Vis spectrum of PAR (20  $\mu$ M)–Hg<sup>2+</sup> (40  $\mu$ M) complex containing  $\beta$ -lactam antibiotics substrate (100  $\mu$ M), a) PenG, b) CLOX, c) CAZ in sodium phosphate buffer (pH 7.0, 20 mM).

## Detection of $\beta$ -lactamase resistance of $\beta$ -lactam antibiotics using PAR–Hg<sup>2+</sup> complex

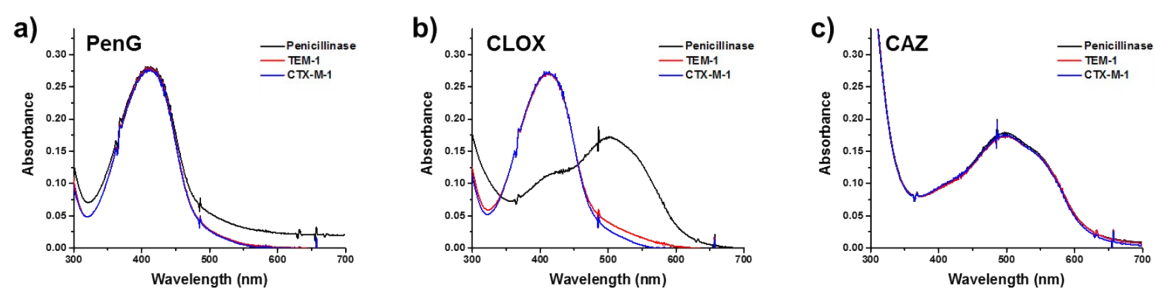

**Figure S2** UV/Vis spectrum of cocktail of  $\beta$ -lactam antibiotics (100  $\mu$ M) and PAR (20  $\mu$ M)–Hg<sup>2+</sup> (40  $\mu$ M) complex after incubation for 20 min with each different  $\beta$ -lactamase (50 ng/mL).

## Characterization of OTS-modified paper

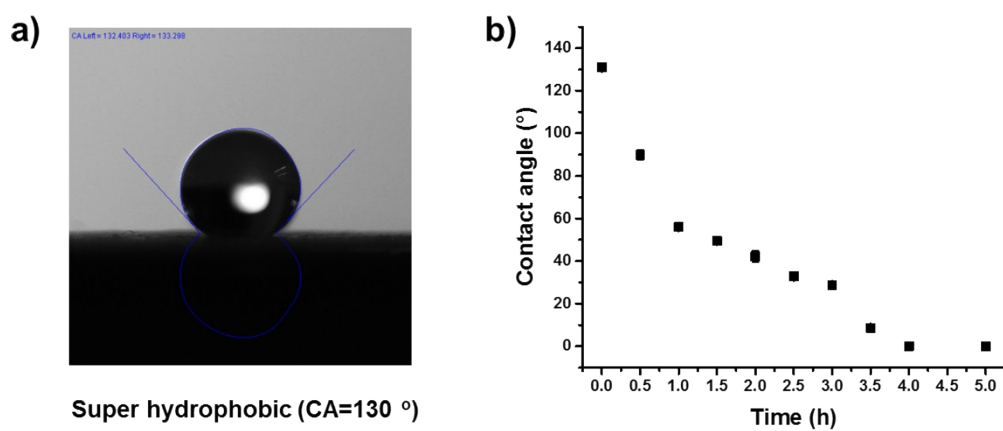

**Figure S3** a) Drop of water (1  $\mu\text{L}$ ) on OTS-modified paper, b) effect of UV exposure time on contact angles.

## Optimization of PAR– $\text{Hg}^{2+}$ complex for paper-based colorimetric assay

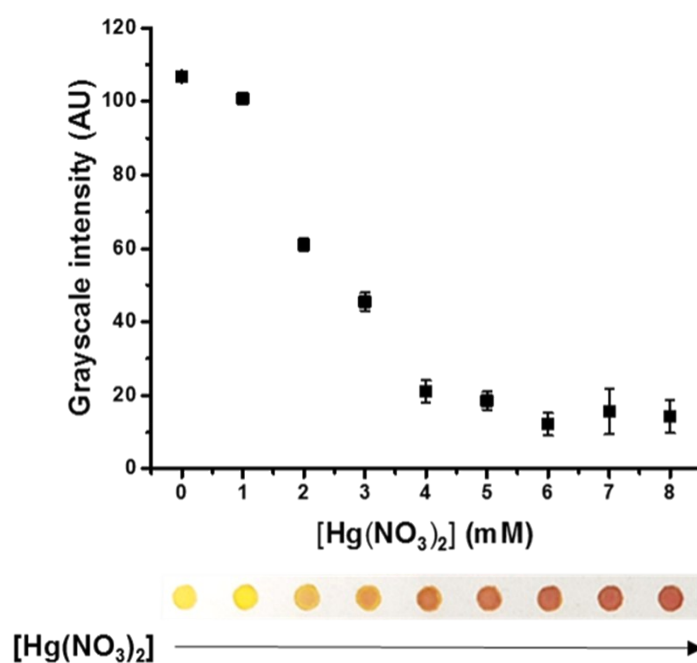

**Figure S4** Plot of intensities of PAR– $\text{Hg}^{2+}$  complex spot versus different  $\text{Hg}(\text{NO}_3)_2$  concentration with fixed PAR (2 mM)..
